# Supplementary material for: Enhanced photoluminescence of a HF free novel NIR phosphor of K2ZnF4:Cr3+by lithium ion doping
Source: Royal Society of Chemistry journal article supplement (doi:10.1039/d3tc01523h), 2023-01-01
Supplement: d3tc01523h1.pdf [file d3tc01523h1.pdf]

## Enhanced photoluminescence of HF free novel NIR phosphor of $K_2ZnF_4:Cr^{3+}$ by lithium ions doping

Yiwen Zhu,<sup>a</sup> Yifan Yang,<sup>a</sup> Yongqi Zhu,<sup>a</sup> Yifan Chen,<sup>b</sup> Zhenyu Liu,<sup>c</sup> Fengmeng Lei,<sup>a</sup> Hua Yu,<sup>a</sup> Qinan Mao,<sup>a</sup> Jiasong Zhong<sup>a\*</sup> and Jing Wang<sup>d\*</sup>

<sup>a</sup> Center for Advanced Optoelectronic Materials, College of Materials & Environmental Engineering, Hangzhou Dianzi University, Hangzhou, 310018, P. R. China.

<sup>b</sup> Hangzhou Vocational & Technical College, Hangzhou, 310018, P. R. China.

<sup>c</sup> Department of Biomedical Engineering, Southern University of Science and Technology, Shenzhen, Guangdong, 518055, China

<sup>d</sup> Ministry of Education Key Laboratory of Bioinorganic and Synthetic Chemistry, State Key Laboratory of Optoelectronic Materials and Technologies, School of Chemistry, Sun Yat-sen University, Guangzhou, Guangdong 510275, P. R. China.

E-mail: [jiasongzhong@hdu.edu.cn](mailto:jiasongzhong@hdu.edu.cn), [ceswj@mail.sysu.edu.cn](mailto:ceswj@mail.sysu.edu.cn).

### Figures

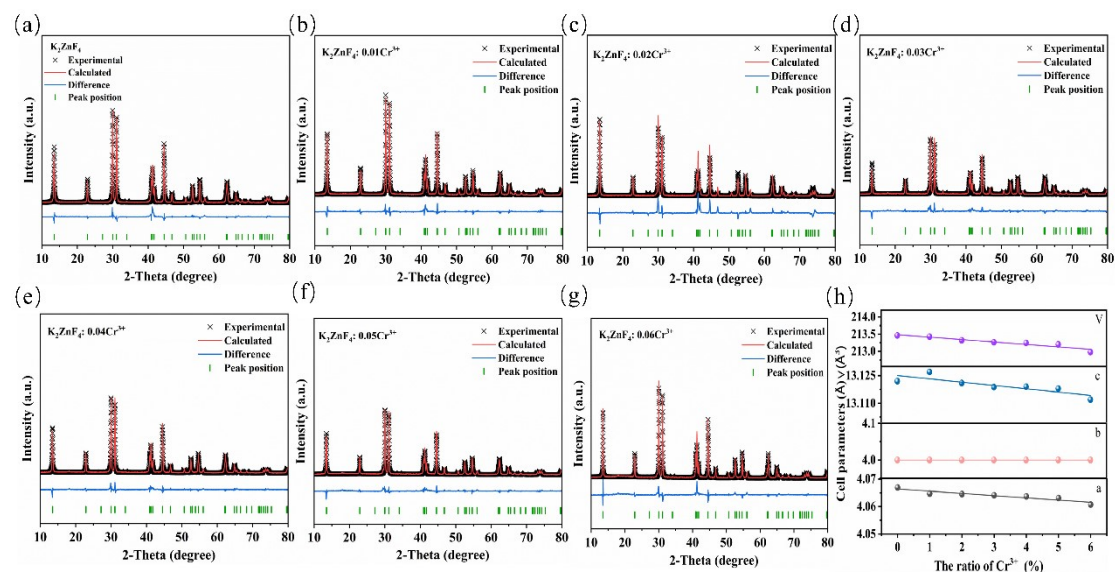

Figure S1: (a)-(g) XRD Rietveld refinement of  $K_2ZnF_4:xCr^{3+}$  ( $x = 0.01, 0.02, 0.03, 0.04, 0.05, 0.06$ ). (h) The cell parameters and volume change of  $K_2ZnF_4:xCr^{3+}$  ( $x = 0.01, 0.02, 0.03, 0.04, 0.05, 0.06$ ).

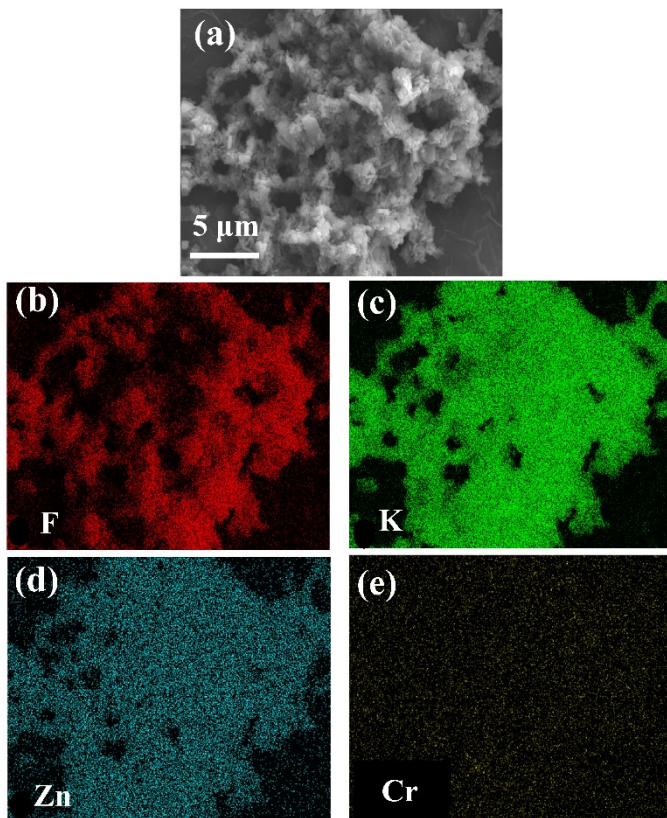

Figure S2: (a) SEM images of  $\text{K}_2\text{ZnF}_4:0.04\text{Cr}^{3+},0.04\text{Li}^+$  particles. (b)-(e) The corresponding element mapping of F, K, Zn and Cr.

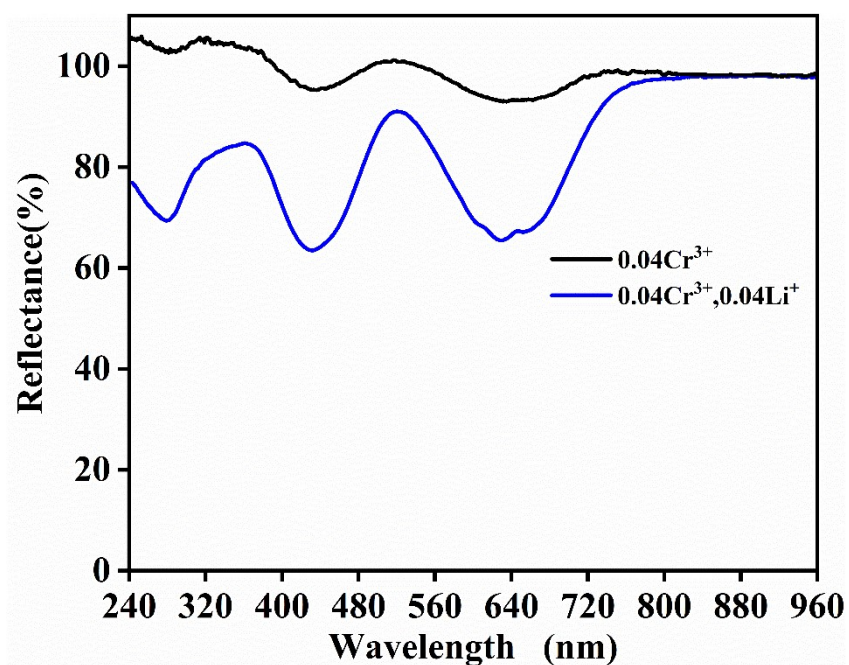

Figure S3: Diffuse reflectance spectra of  $\text{K}_2\text{ZnF}_4:0.04\text{Cr}^{3+}$  and  $\text{K}_2\text{ZnF}_4:0.04\text{Cr}^{3+},0.04\text{Li}^+$ .
